# Supplementary material for: The burden of typhoid fever in low- and middle-income countries: A meta-regression approach
Source: PLoS Negl Trop Dis. 2017 Feb 27;11(2):e0005376. doi: 10.1371/journal.pntd.0005376 (PMC5344533; doi:10.1371/journal.pntd.0005376)
Supplement: S3 Table — (DOCX) [file pntd.0005376.s004.docx]

**Table S3. Random effect variance-covariance matrix.**

|  | ***α0*** | ***α1*** | ***α2*** | ***α3*** |
| --- | --- | --- | --- | --- |
| ***α0*** | 0.73 |  |  |  |
| ***α1*** | 0.42 | 2.37 |  |  |
| ***α2*** | 0.28 | 1.12 | 1.14 |  |
| ***α3*** | -0.21 | 0.25 | -0.17 | 0.32 |

**α0 =** Random effect for the log incidence rate of 5-15 year olds

**α1 =** Random effect for the log incidence rate ratio between 0-2 year olds and 5-15 year olds

**α2 =** Random effect for the log incidence rate ratio between 2-5 year olds and 5-15 year olds

**α3 =** Random effect for the log incidence rate ratio between adults and 5-15 year olds

Note: these are the variance-covariance estimates of incidence on the natural log scale.
